# Supplementary material for: Substrate prediction for RiPP biosynthetic enzymes via masked language modeling and transfer learning
Source: Royal Society of Chemistry journal article supplement (doi:10.1039/d4dd00170b), 2024-12-02
Supplement: d4dd00170b1.pdf [file d4dd00170b1.pdf]

# Electronic Supplementary Information: Substrate Prediction for RiPP Biosynthetic Enzymes via Masked Language Modeling and Transfer Learning

Joseph D. Clark,<sup>a</sup> Xuenan Mi,<sup>b</sup> Douglas A. Mitchell,<sup>c</sup> and Diwakar Shukla <sup>\*bde</sup>

<sup>a</sup>School of Molecular and Cellular Biology, University of Illinois at Urbana-Champaign, Urbana, IL, 61801

<sup>b</sup>Center for Biophysics and Quantitative Biology, University of Illinois at Urbana-Champaign, Urbana, IL, 61801

<sup>c</sup>Department of Chemistry, University of Illinois Urbana-Champaign, Urbana, IL, 61801.

<sup>d</sup>Department of Chemical and Biomolecular Engineering, University of Illinois at Urbana-Champaign, Urbana, IL, 61801

<sup>e</sup>Department of Bioengineering, University of Illinois Urbana-Champaign, Urbana, IL 61801.  
Email: diwakar@illinois.edu

Table S1: Hyperparameter Grid for Downstream Substrate Prediction Model Optimization

| Downstream model type | Hyperparameter     | Values            |
|-----------------------|--------------------|-------------------|
| LR                    | C                  | 0.01, 0.1, 1, 5   |
| RF                    | n_estimators       | 5, 25, 50, 100    |
| AB                    | n_estimators       | 5, 25, 50, 100    |
| SVC                   | C                  | 0.01, 0.1, 1, 5   |
| MLP                   | hidden_layer_sizes | 50, 100, 200, 500 |

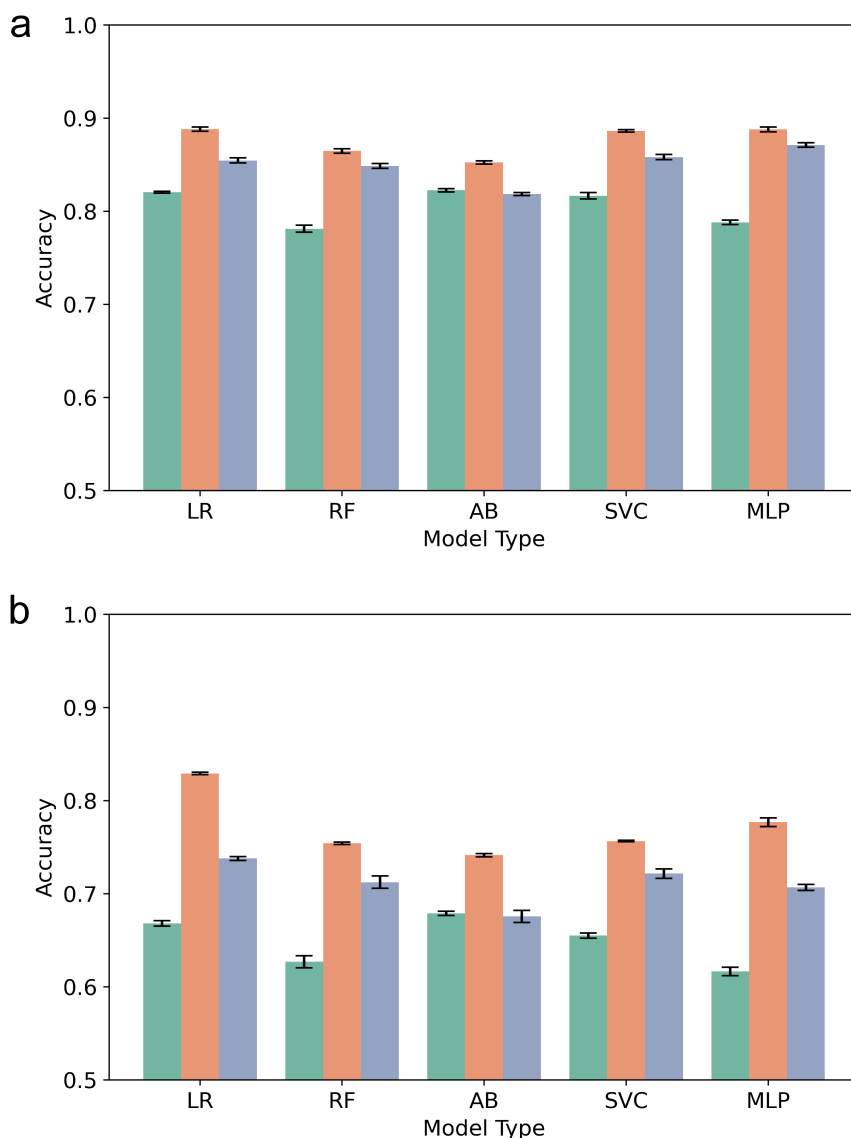

Figure S1: Accuracy of logistic regression (LR), random forest (RF), AdaBoost (AB), support vector classifier (SVC), and multi-layer perceptron (MLP) models trained using extended connectivity fingerprint (ECFP) representations of peptide sequences (green), embeddings from the protein language model ESM-2 (orange), and embeddings from the protein language model ProtBert (blue) for the a) LazBF substrate prediction task ( $n = 1,000$ ) and b) the LazDEF substrate prediction task ( $n = 1,000$ ). ESM-2 embeddings consistently outperform ECFP encodings and ProtBert embeddings.

Table S2: Downstream LazBF Substrate Prediction Model Hyperparameters

| PLM, N           | LR     | RF               | AB               | SVC    | MLP                    |
|------------------|--------|------------------|------------------|--------|------------------------|
| Vanilla, High-N  | C=0.1  | n_estimators=50  | n_estimators=100 | C=5    | hidden_layer_sizes=500 |
| Peptide, High-N  | C=1    | n_estimators=50  | n_estimators=50  | C=1    | hidden_layer_sizes=200 |
| LazBF, High-N    | C=0.1  | n_estimators=25  | n_estimators=100 | C=0.1  | hidden_layer_sizes=50  |
| LazDEF, High-N   | C=0.1  | n_estimators=100 | n_estimators=100 | C=5    | hidden_layer_sizes=100 |
| LazBCDEF, High-N | C=0.1  | n_estimators=25  | n_estimators=100 | C=5    | hidden_layer_sizes=50  |
| Vanilla, Med-N   | C=0.1  | n_estimators=50  | n_estimators=100 | C=1    | hidden_layer_sizes=50  |
| Peptide, Med-N   | C=0.01 | n_estimators=50  | n_estimators=100 | C=1    | hidden_layer_sizes=50  |
| LazBF, Med-N     | C=1    | n_estimators=50  | n_estimators=100 | C=1    | hidden_layer_sizes=50  |
| LazDEF, Med-N    | C=0.1  | n_estimators=100 | n_estimators=100 | C=5    | hidden_layer_sizes=200 |
| LazBCDEF, Med-N  | C=0.01 | n_estimators=100 | n_estimators=50  | C=5    | hidden_layer_sizes=500 |
| Vanilla, Low-N   | C=0.1  | n_estimators=100 | n_estimators=100 | C=1    | hidden_layer_sizes=100 |
| Peptide, Low-N   | C=0.01 | n_estimators=100 | n_estimators=25  | C=1    | hidden_layer_sizes=500 |
| LazBF, Low-N     | C=0.01 | n_estimators=50  | n_estimators=50  | C=1    | hidden_layer_sizes=100 |
| LazDEF, Low-N    | C=0.01 | n_estimators=50  | n_estimators=50  | C=0.01 | hidden_layer_sizes=500 |
| LazBCDEF, Low-N  | C=5    | n_estimators=100 | n_estimators=25  | C=5    | hidden_layer_sizes=100 |

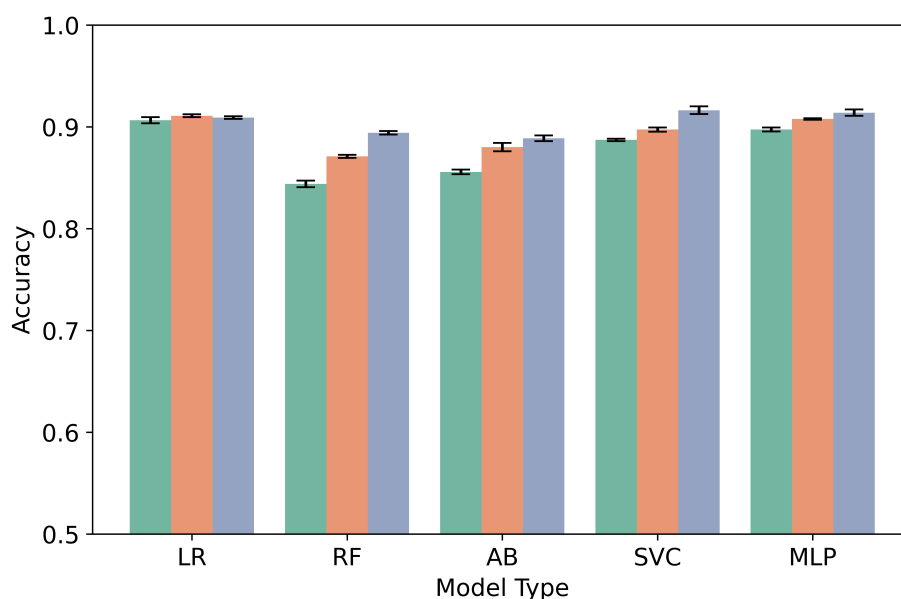

Figure S2: Accuracy of logistic regression (LR), random forest (RF), AdaBoost (AB), support vector classifier (SVC), and multi-layer perceptron (MLP) models trained using embeddings from a peptide language model trained on LazDEF substrates and non-substrates, with learning rates of  $3e-4$  (green),  $3e-5$  (orange), and  $3e-6$  (blue) for the LazBF substrate prediction task ( $n = 1,000$ ). Embeddings from the model trained with a learning rate of  $3e-6$  outperform embeddings from models trained with higher learning rates.

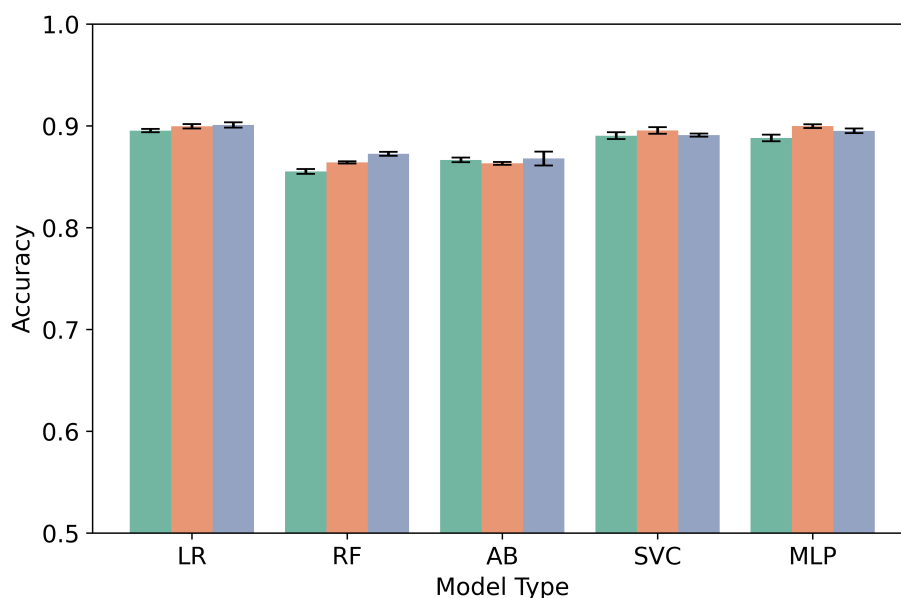

Figure S3: Accuracy of logistic regression (LR), random forest (RF), AdaBoost (AB), support vector classifier (SVC), and multi-layer perceptron (MLP) models trained using embeddings from a peptide language model trained on LazDEF substrates and non-substrates, with a batch size of 64 (green), 128 (orange), and 256 (blue) for the LazBF substrate prediction task ( $n = 1,000$ ). Embeddings from the model trained with a batch size of 256 perform similar or better embeddings from models trained with lower batch sizes.

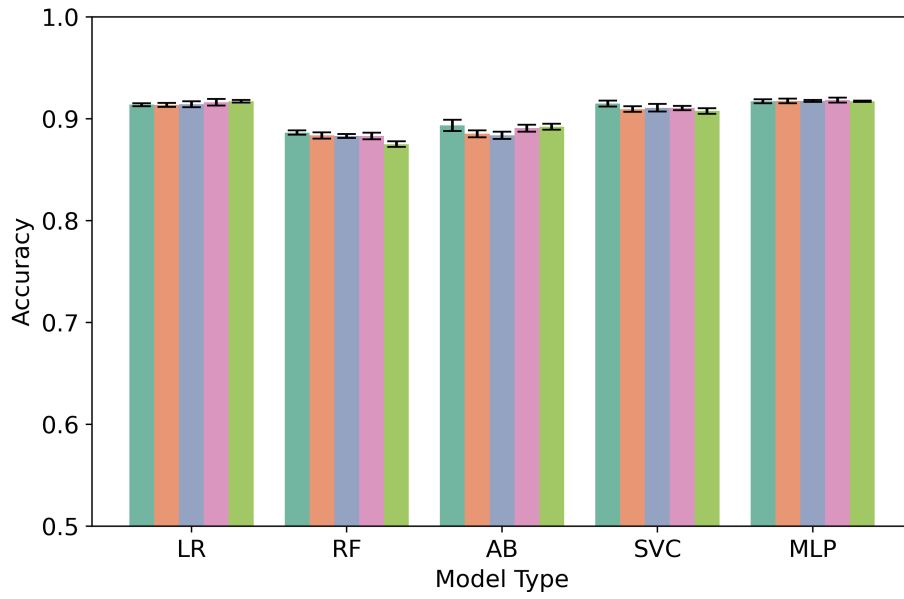

Figure S4: Accuracy of logistic regression (LR), random forest (RF), AdaBoost (AB), support vector classifier (SVC), and multi-layer perceptron (MLP) models trained using embeddings from a peptide language model trained on LazDEF substrates and non-substrates for one epoch (green), two epochs (orange), three epochs (blue), four epochs (pink), and five epochs (lime) for the LazBF substrate prediction task ( $n = 1,000$ ). Embeddings from the models trained for more than one epoch did not increase the performance of LazBF substrate classifiers.

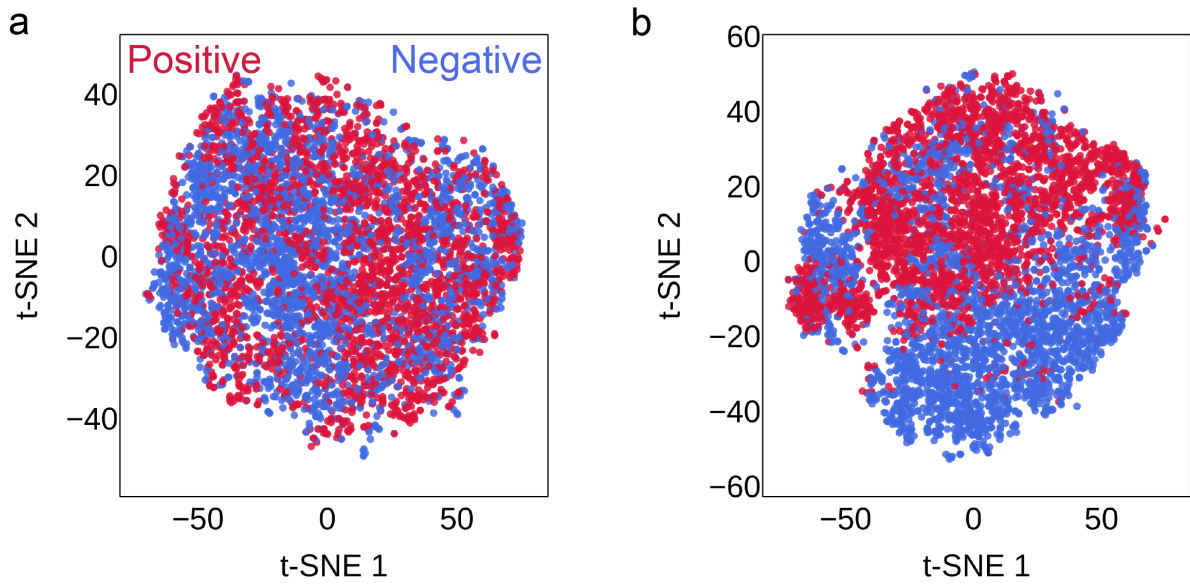

Figure S5: t-SNE visualization of the embedding space of ESM trained on non-LazA peptides a) LazDEF substrates/non-substrates, and b) LazBF substrates/non-substrates. Substrates are red and non-substrates samples are blue.

Table S3: Downstream LazDEF Substrate Prediction Model Hyperparameters

| PLM, N           | LR     | RF               | AB               | SVC   | MLP                    |
|------------------|--------|------------------|------------------|-------|------------------------|
| Vanilla, High-N  | C=0.1  | n_estimators=100 | n_estimators=100 | C=1   | hidden_layer_sizes=100 |
| Peptide, High-N  | C=5    | n_estimators=50  | n_estimators=100 | C=5   | hidden_layer_sizes=200 |
| LazBF, High-N    | C=1    | n_estimators=50  | n_estimators=100 | C=5   | hidden_layer_sizes=100 |
| LazDEF, High-N   | C=0.01 | n_estimators=100 | n_estimators=25  | C=1   | hidden_layer_sizes=50  |
| LazBCDEF, High-N | C=0.1  | n_estimators=100 | n_estimators=100 | C=5   | hidden_layer_sizes=50  |
| Vanilla, Med-N   | C=0.1  | n_estimators=100 | n_estimators=50  | C=1   | hidden_layer_sizes=500 |
| Peptide, Med-N   | C=0.1  | n_estimators=50  | n_estimators=100 | C=1   | hidden_layer_sizes=50  |
| LazBF, Med-N     | C=0.01 | n_estimators=100 | n_estimators=100 | C=1   | hidden_layer_sizes=100 |
| LazDEF, Med-N    | C=0.01 | n_estimators=100 | n_estimators=100 | C=0.1 | hidden_layer_sizes=50  |
| LazBCDEF, Med-N  | C=0.1  | n_estimators=100 | n_estimators=100 | C=5   | hidden_layer_sizes=50  |
| Vanilla, Low-N   | C=0.01 | n_estimators=100 | n_estimators=100 | C=1   | hidden_layer_sizes=500 |
| Peptide, Low-N   | C=0.1  | n_estimators=100 | n_estimators=25  | C=5   | hidden_layer_sizes=500 |
| LazBF, Low-N     | C=0.01 | n_estimators=100 | n_estimators=25  | C=1   | hidden_layer_sizes=100 |
| LazDEF, Low-N    | C=0.01 | n_estimators=25  | n_estimators=25  | C=0.1 | hidden_layer_sizes=50  |
| LazBCDEF, Low-N  | C=0.1  | n_estimators=25  | n_estimators=50  | C=5   | hidden_layer_sizes=100 |

Table S4: Hyperparameters for Masked Language Modeling

| Hyperparameter          | Peptide-ESM        | LazBF-ESM          | LazDEF-ESM         | LazBCDEF-ESM       |
|-------------------------|--------------------|--------------------|--------------------|--------------------|
| Learning rate           | $3 \times 10^{-6}$ | $3 \times 10^{-6}$ | $3 \times 10^{-6}$ | $3 \times 10^{-6}$ |
| Learning rate scheduler | Linear             | Linear             | Linear             | Linear             |
| Precision               | fp16               | fp16               | fp16               | fp16               |
| Batch size              | 256                | 256                | 256                | 256                |
| Weight decay            | 0.01               | 0.01               | 0.01               | 0.01               |
| Training epochs         | 2                  | 1                  | 1                  | 1                  |
| Adam Beta 1             | 0.9                | 0.9                | 0.9                | 0.9                |
| Adam Beta 2             | 0.999              | 0.999              | 0.999              | 0.999              |
| Adam Epsilon            | $1 \times 10^{-8}$ | $1 \times 10^{-8}$ | $1 \times 10^{-8}$ | $1 \times 10^{-8}$ |

Table S5: Hyperparameters for Fine-Tuned Models with 35M and 650M Parameters

| Hyperparameter              | 650M parameters    | 35M parameters     |
|-----------------------------|--------------------|--------------------|
| Learning rate               | $2 \times 10^{-4}$ | $2 \times 10^{-4}$ |
| Learning rate scheduler     | Linear             | Linear             |
| Precision                   | fp16               | fp16               |
| Batch size                  | 256                | 128                |
| Weight decay                | 0.01               | 0.01               |
| Dropout probability         | 0.1                | 0.1                |
| Gradient accumulation steps | 2                  | 2                  |
| Training epochs             | 1                  | 1                  |
| Adam Beta 1                 | 0.9                | 0.9                |
| Adam Beta 2                 | 0.999              | 0.999              |
| Adam Epsilon                | $1 \times 10^{-8}$ | $1 \times 10^{-8}$ |

Table S6: Classification Accuracy of Fine-Tuned Models with 35M and 650M Parameters

|                 | LazBF test set | LazDEF test set | LazBCDEF test set |
|-----------------|----------------|-----------------|-------------------|
| 650M parameters | 99.4%          | 99.2%           | 95.8%             |
| 35M parameters  | 99.4%          | 99.2%           | 95.8%             |

Table S7: Classification accuracy of fine-tuned LazBF substrate prediction models with different dropout probabilities

| Dropout probability | LazBF test set | LazDEF test set | LazBCDEF test set |
|---------------------|----------------|-----------------|-------------------|
| 0.1                 | 99.34%         | 50.93%          | 52.42%            |
| 0.2                 | 99.37%         | 50.86%          | 52.37%            |
| 0.3                 | 99.36%         | 51.00%          | 52.39%            |
| 0.4                 | 99.35%         | 50.94%          | 52.34%            |
| 0.5                 | 99.378%        | 50.98%          | 52.48%            |

Table S8: Zero-shot Classification Accuracy of Downstream Models

|                     | LazBF test set | LazDEF test set |
|---------------------|----------------|-----------------|
| LazBF SVC (Low-N)   | -              | 54.2%           |
| LazBF SVC (Med-N)   | -              | 58.3%           |
| LazBF SVC (High-N)  | -              | 54.7%           |
| LazDEF SVC (Low-N)  | 70.2%          | -               |
| LazDEF SVC (Med-N)  | 72.1%          | -               |
| LazDEF SVC (High-N) | 70.5%          | -               |

Table S9: Classification accuracy of fine-tuned LazBF substrate prediction model across 10 epochs of training

| Epoch | LazBF | LazDEF | LazBCDEF |
|-------|-------|--------|----------|
| 1     | 99.2% | 50.9%  | 52.5%    |
| 2     | 99.3% | 51.2%  | 52.4%    |
| 3     | 99.4% | 51.0%  | 52.3%    |
| 4     | 99.4% | 50.9%  | 52.4%    |
| 5     | 99.4% | 51.0%  | 52.6%    |
| 6     | 99.4% | 51.0%  | 52.5%    |
| 7     | 99.4% | 51.2%  | 52.6%    |
| 8     | 99.4% | 51.1%  | 52.5%    |
| 9     | 99.4% | 51.1%  | 52.6%    |
| 10    | 99.4% | 51.0%  | 52.3%    |

Table S10: Classification accuracy of fine-tuned LazDEF substrate prediction model across 10 epochs of training

| Epoch | LazBF | LazDEF | LazBCDEF |
|-------|-------|--------|----------|
| 1     | 69.8% | 99.0%  | 63.2%    |
| 2     | 71.4% | 99.0%  | 62.7%    |
| 3     | 70.4% | 99.1%  | 63.6%    |
| 4     | 70.2% | 99.0%  | 61.2%    |
| 5     | 71.1% | 99.0%  | 62.1%    |
| 6     | 68.6% | 99.1%  | 62.3%    |
| 7     | 69.7% | 99.0%  | 61.8%    |
| 8     | 69.3% | 99.0%  | 61.5%    |
| 9     | 69.5% | 99.1%  | 61.2%    |
| 10    | 68.7% | 99.1%  | 61.8%    |

Table S11: Classification accuracy of fine-tuned LazBCDEF substrate prediction model across 10 epochs of training

| Epoch | LazBF | LazDEF | LazBCDEF |
|-------|-------|--------|----------|
| 1     | 64.7% | 59.1%  | 95.2%    |
| 2     | 64.7% | 58.9%  | 95.5%    |
| 3     | 65.4% | 59.1%  | 95.6%    |
| 4     | 62.5% | 59.5%  | 95.5%    |
| 5     | 61.3% | 58.0%  | 95.3%    |
| 6     | 62.7% | 58.3%  | 94.9%    |
| 7     | 62.3% | 58.0%  | 95.1%    |
| 8     | 62.2% | 58.9%  | 94.8%    |
| 9     | 62.9% | 58.4%  | 94.8%    |
| 10    | 62.8% | 58.6%  | 94.9%    |

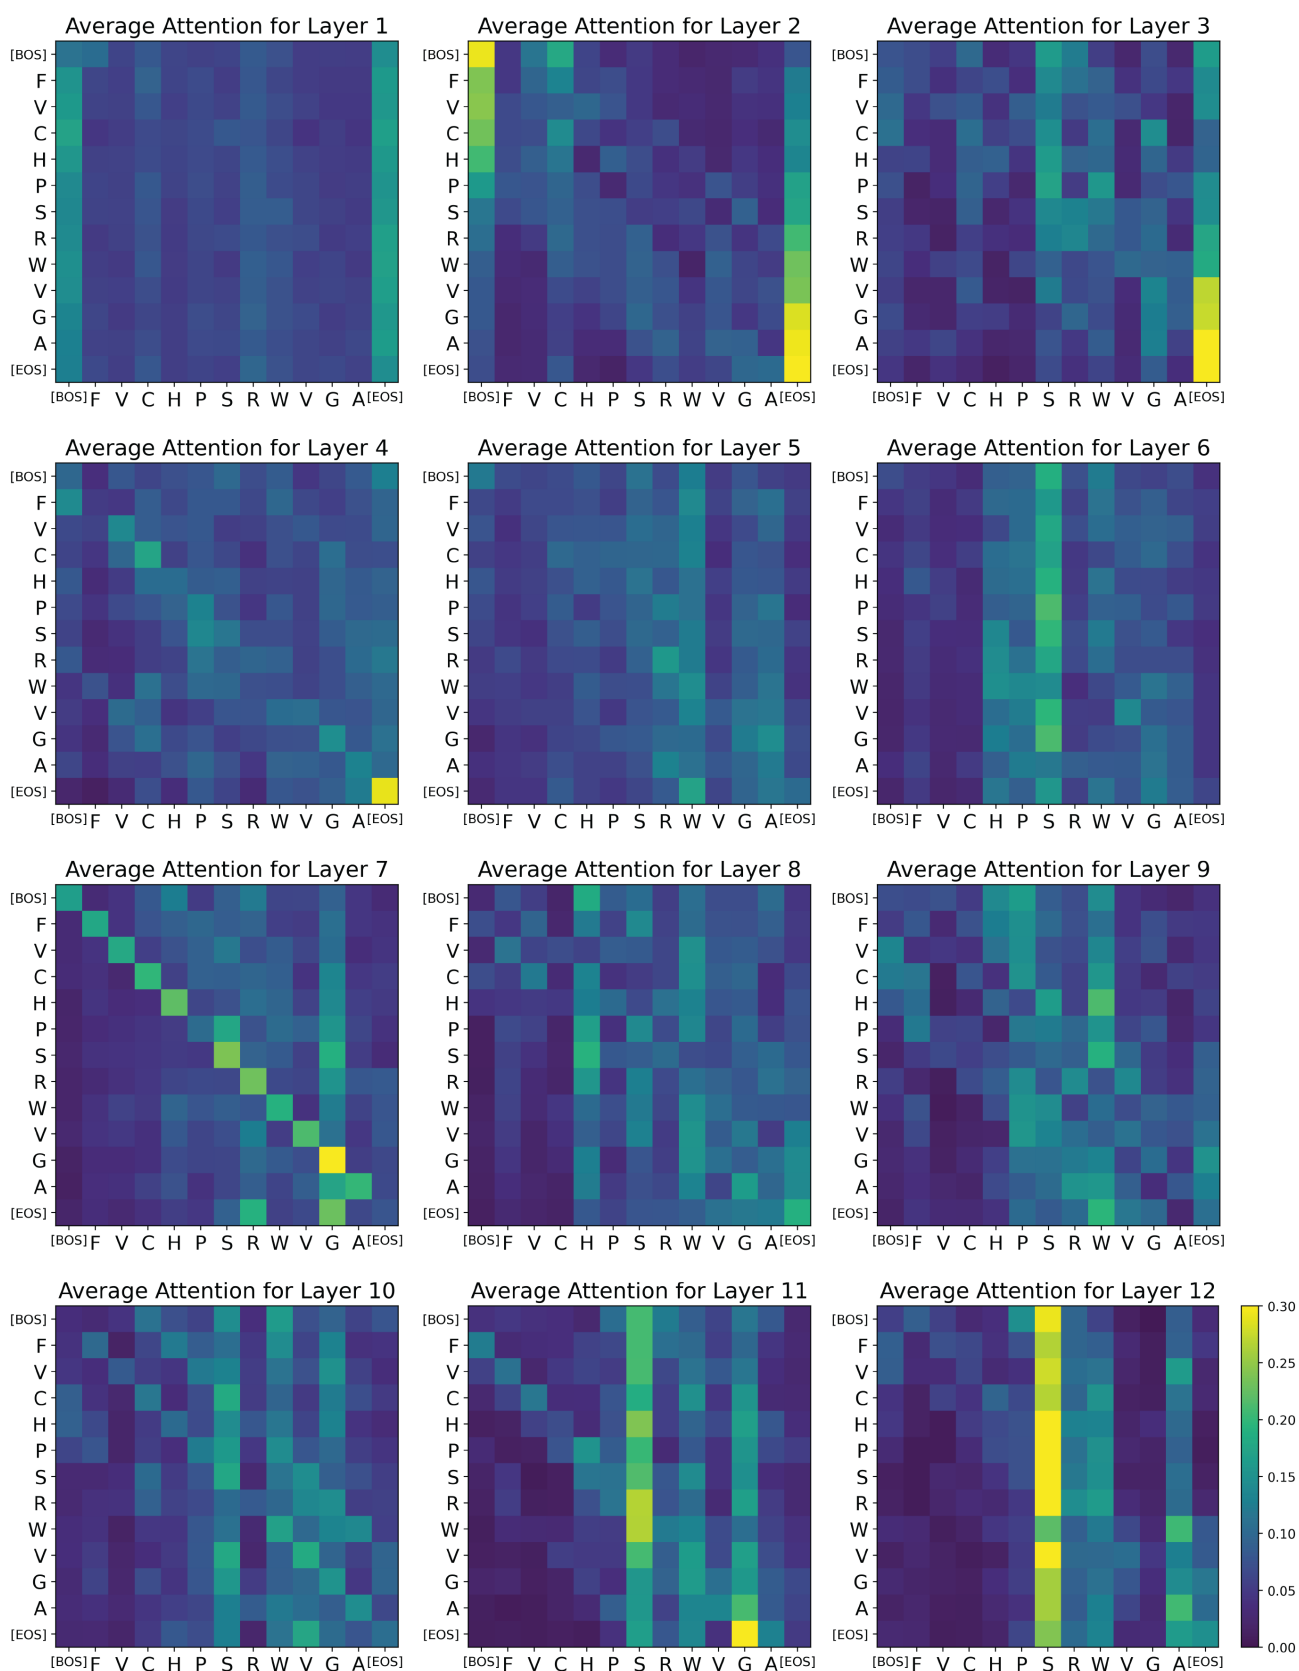

Figure S6: The average attention for all 12 layers of the fine-tuned LazBF-ESM for the LazBF substrate FVCHPSRWVGA.

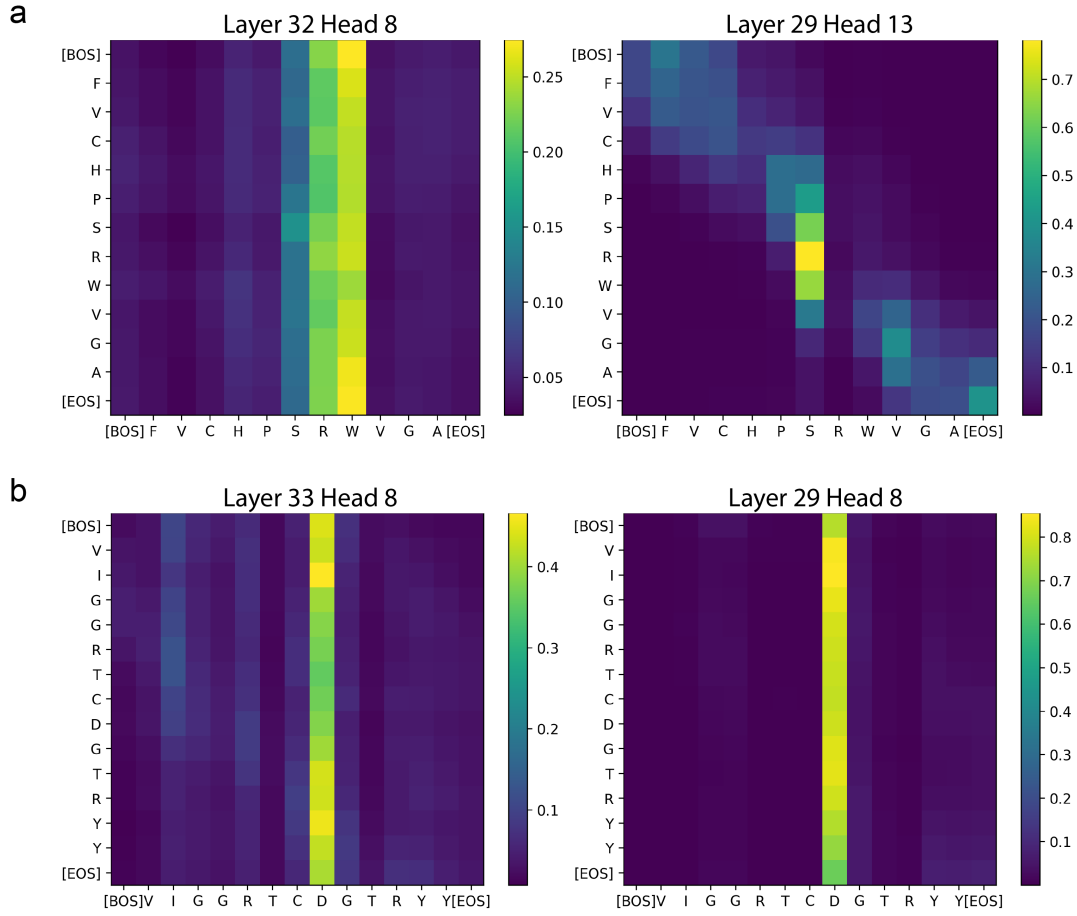

Figure S7: Attention maps from the fine-tuned LazBF-ESM with 650M parameters. [BOS] and [EOS] tokens mark the “beginning of sequence” and “end of sequence” respectively. a) Attention heads from the later layers highlight a motif with high pairwise epi-scores in a LazBF substrate. c) Attention heads from the later layers highlight a residue important for substrate fitness in a LazDEF substrate.
